# Supplementary material for: Natural Diet of Coral-Excavating Sponges Consists Mainly of Dissolved Organic Carbon (DOC)
Source: PubMed Central journal article supplement (PMC3934968; doi:10.1371/journal.pone.0090152), 2014-02-25
Supplement: pone.0090152.s001.pdf [file pone.0090152.s001.pdf]

**Table S1.** Sampling dates, locations, depth as well as sampling rates for *Siphonodictyon* sp. and *Cliona delitrix*.

| Species                   | ID  | Date       | Location             | Depth<br>(m)  | Sampling rate<br>(ml min <sup>-1</sup> ) |
|---------------------------|-----|------------|----------------------|---------------|------------------------------------------|
| <i>Siphonodictyon</i> sp. | S1  | 09/05/2013 | Daaibooi/Curaçao     | 19            | 1.8                                      |
|                           | S2  | 09/05/2013 | Playa Jeremy/Curaçao | 17            | 1.3                                      |
|                           | S3  | 10/05/2013 | Playa Jeremy/Curaçao | 20            | 4.5                                      |
|                           | S4  | 12/05/2013 | Playa Jeremy/Curaçao | 20            | 1.7                                      |
|                           | S5  | 12/05/2013 | Playa Jeremy/Curaçao | 18            | 2.8                                      |
|                           | S6  | 27/05/2013 | Daaibooi/Curaçao     | 19            | 3.9                                      |
|                           | S7  | 27/05/2013 | Daaibooi/Curaçao     | 18            | 2.9                                      |
|                           | S8  | 27/05/2013 | Daaibooi/Curaçao     | 18            | 2.5                                      |
| <b>Average (±SD)</b>      |     |            |                      | <b>19 ± 1</b> | <b>2.9 ± 1.2</b>                         |
| <i>Cliona delitrix</i>    | C1  | 20/05/2013 | Playa Lechi/Bonaire  | 12            | 2.0                                      |
|                           | C2  | 20/05/2013 | Playa Lechi/Bonaire  | 15            | 2.7                                      |
|                           | C3  | 20/05/2013 | Playa Lechi/Bonaire  | 14            | 1.8                                      |
|                           | C4  | 20/05/2013 | Playa Lechi/Bonaire  | 14            | 1.8                                      |
|                           | C5  | 20/05/2013 | Playa Lechi/Bonaire  | 13            | 1.7                                      |
|                           | C6  | 20/05/2013 | Playa Lechi/Bonaire  | 16            | 1.6                                      |
|                           | C7  | 21/05/2013 | Playa Lechi/Bonaire  | 14            | 1.6                                      |
|                           | C8  | 21/05/2013 | Playa Lechi/Bonaire  | 14            | 2.1                                      |
|                           | C9  | 21/05/2013 | Playa Lechi/Bonaire  | 12            | 1.6                                      |
|                           | C10 | 21/05/2013 | Playa Lechi/Bonaire  | 12            | 1.7                                      |
| <b>Average (±SD)</b>      |     |            |                      | <b>13 ± 1</b> | <b>1.9 ± 0.3</b>                         |
