# Supplementary material for: Natural Diet of Coral-Excavating Sponges Consists Mainly of Dissolved Organic Carbon (DOC)
Source: PubMed Central journal article supplement (PMC3934968; doi:10.1371/journal.pone.0090152), 2014-02-25
Supplement: pone.0090152.s002.pdf [file pone.0090152.s002.pdf]

**Table S2.** Confirmed DOC feeding by sponges.

| class          | order           | species                                                                                   | environment                                                     | Reference                                                         |
|----------------|-----------------|-------------------------------------------------------------------------------------------|-----------------------------------------------------------------|-------------------------------------------------------------------|
| Demospongia    | Agelasida       | <i>Agelas oroides</i>                                                                     | Mediterranean                                                   | Ribes et al. 2012                                                 |
|                | Chondrosida     | <i>Chondrosia reniformis</i><br><i>Chondrilla caribensis</i><br><i>Halisarca caerulea</i> | Mediterranean<br>Caribbean; coral reef<br>Caribbean; coral reef | Ribes et al. 2012<br>de Goeij et al. 2013<br>de Goeij et al. 2008 |
|                | Hadromerida     | <i>Cliona delitrix</i>                                                                    | Caribbean; coral reef                                           | this study                                                        |
|                | Halichondrida   | <i>Higginsia thielei</i><br><i>Scopalina ruetzleri</i>                                    | NE Atlantic; deep water coral reef<br>Caribbean; coral reef     | van Duyl et al 2008<br>de Goeij et al. 2013                       |
|                | Haplosclerida   | <i>Haliclona implexiformis</i><br><i>Siphonodictyon sp.</i>                               | Caribbean; coral reef<br>Caribbean; coral reef                  | de Goeij et al. 2013<br>this study                                |
|                | Lithistida      | <i>Theonella swinhoei</i>                                                                 | Red Sea; coral reef                                             | Yahel et al. 2003                                                 |
|                | Poecilosclerida | <i>Merlia normani</i><br><i>Mycale microsigmatosa</i>                                     | Caribbean; coral reef<br>Caribbean; coral reef                  | de Goeij et al. 2008<br>de Goeij et al. 2008                      |
| Hexactinellida | Lyssacosida     | <i>Nodastrella nodastrella</i>                                                            | NE Atlantic; deep water coral reef                              | van Duyl et al 2008                                               |

**References:**

De Goeij JM, Van den Berg H, Van Oostveen MM, Epping EHG, Van Van Duyl FC (2008) Major bulk dissolved organic carbon (DOC) removal by encrusting coral reef cavity sponges. *Mar Ecol Prog Ser* 357: 139-151

De Goeij JM, Van Oevelen D, Vermeij JMA, Osinga R, Middelburg JJ, De Goeij AFPM, Admiraal W (2013) Surviving in a marine desert: the sponge loop retains resources within coral reefs. *Science* 342: 108-110

Ribes M, Jimenez E, Yahel G, Lopez-Sendino P, Diez B, Massana R, Sharp JH, Coma R (2012) Functional convergence of microbes associated with temperate marine sponges. *Environ Microbiol* 14: 1224-1239

Van Duyl FC, Hegeman J, Hoogstraten A, Maier C (2008) Dissolved carbon fixation by sponge-microbe consortia of deep water coral mounds in the northeastern Atlantic Ocean. *Mar Ecol Prog Ser* 358: 137-150

Yahel G, Sharp JH, Marie D, Haese C, Genin A (2003) *In situ* feeding and element removal in the symbiont-bearing sponge *Theonella swinhoei*: bulk DOC is the major source for carbon. *Limnol Oceanogr* 48:141–149
